# Supplementary material
Source: bioRxiv or medRxiv preprint supplement (https://www.biorxiv.org/highwire/filestream/94184/field_highwire_adjunct_files/4/306266-5.pdf)
Supplement: Supplementary file [file 306266-5.pdf]

**Supplementary Table 2.**

| <b>Metabolic Pathway</b>                       | <b>Metabolite Names</b>                                                                                                                                                                                                                                                                                                                                                                                                                                                                                                                                                                                                                                                                                                                                                                                      |
|------------------------------------------------|--------------------------------------------------------------------------------------------------------------------------------------------------------------------------------------------------------------------------------------------------------------------------------------------------------------------------------------------------------------------------------------------------------------------------------------------------------------------------------------------------------------------------------------------------------------------------------------------------------------------------------------------------------------------------------------------------------------------------------------------------------------------------------------------------------------|
| Glycosphingolipid metabolism                   | Choline phosphate; Phosphorylcholine; Phosphocholine; D-Glucose; Grape sugar; Sphinganine; Dihydrosphingosine; Psychosine; Galactosylsphingosine; N-Acetylneuraminate; N-Acetylneuraminic acid; 5-Acetamido-3,5-dideoxy-D-glycero-D-galacto-2-nonulosonic acid; CMP; Cytidine-5'-monophosphate; Sphingosine; Sphingenine; Sphingoid; 3-Dehydrosphinganine; beta-D-Galactose                                                                                                                                                                                                                                                                                                                                                                                                                                  |
| Glycerophospholipid metabolism                 | Choline phosphate; Phosphorylcholine; Phosphocholine; Glycerol; Glycerin; 1,2,3-Trihydroxypropane; Acetylcholine; Sphinganine; Dihydrosphingosine; myo-Inositol; D-myo-Inositol; 1D-myo-Inositol; L-myo-Inositol; 1L-myo-Inositol; meso-Inositol; Inositol; Dambose; Cyclohexitol; Meat sugar; CTP; Cytidine 5'-triphosphate; Linoleate; Linoleic acid; (9Z,12Z)-Octadecadienoic acid; 9-cis,12-cis-Octadecadienoate; CMP; Cytidine-5'-monophosphate; (5Z,8Z,11Z,14Z)-Icosatetraenoic acid; Arachidonate; Arachidonic acid; Sphingosine; Sphingenine; Sphingoid; Inositol 1-phosphate; myo-Inositol 1-phosphate; 1D-myo-Inositol 1-phosphate; D-myo-Inositol 1-phosphate; 1D-myo-Inositol 1-monophosphate                                                                                                    |
| Biopterin metabolism                           | L-Phenylalanine; L-Tyrosine; (S)-3-(p-Hydroxyphenyl)alanine; (S)-2-Amino-3-(p-hydroxyphenyl)propionic acid; Tetrahydrobiopterin; 5,6,7,8-Tetrahydrobiopterin; 6-Pyruvoyltetrahydropterin; 6-(1,2-Dioxopropyl)-5,6,7,8-tetrahydropterin; quinonoid dihydrobiopterin                                                                                                                                                                                                                                                                                                                                                                                                                                                                                                                                           |
| Tyrosine metabolism                            | Phenethylamine; Tetrahydrobiopterin; 5,6,7,8-Tetrahydrobiopterin; L-Phenylalanine; Ascorbate; Ascorbic acid; L-Ascorbate; L-Ascorbic acid; L-Tyrosine; (S)-3-(p-Hydroxyphenyl)alanine; (S)-2-Amino-3-(p-hydroxyphenyl)propionic acid; Dopamine; 4-(2-Aminoethyl)-1,2-benzenediol; 4-(2-Aminoethyl)benzene-1,2-diol; 3,4-Dihydroxyphenylacetaldehyde; 3-O-methyl-dopa                                                                                                                                                                                                                                                                                                                                                                                                                                         |
| N-Glycan biosynthesis                          | D-Mannose; Mannose; Seminose; CMP; Cytidine-5'-monophosphate; CTP; Cytidine 5'-triphosphate; Dolichyl phosphate D-mannose; D-Glucose; Grape sugar; Dextrose                                                                                                                                                                                                                                                                                                                                                                                                                                                                                                                                                                                                                                                  |
| Linoleate metabolism                           | Ascorbate; Ascorbic acid; L-Ascorbate; L-Ascorbic acid; Linoleate; Linoleic acid; (9Z,12Z)-Octadecadienoic acid; 9-cis,12-cis-Octadecadienoate; 9(S)-HPODE; 9(S)-HPOD; (9Z,11E)-(13S)-13-Hydroperoxyoctadeca-9,11-dienoic acid; (9Z,11E)-(13S)-13-Hydroperoxyoctadeca-9,11-dienoate; 13(S)-HPODE; 13S-Hydroperoxy-9Z,11E-octadecadienoic acid                                                                                                                                                                                                                                                                                                                                                                                                                                                                |
| N-Glycan Degradation                           | D-Mannose; Mannose; Seminose; Carubinose; N-Acetylneuraminate; N-Acetylneuraminic acid; 5-Acetamido-3,5-dideoxy-D-glycero-D-galacto-2-nonulosonic acid; Neu5Ac $\beta$ -D-Galactose                                                                                                                                                                                                                                                                                                                                                                                                                                                                                                                                                                                                                          |
| Pentose phosphate pathway                      | D-Sedoheptulose 1,7-bisphosphate; Deoxyribose; 2-Deoxy-D-erythro-pentose; Thyminose; D-Fructose 6-phosphate; D-Fructose 6-phosphoric acid; Sedoheptulose 1-phosphate; Sedoheptulose 7-phosphate; D-Glucose 6-phosphate; Glucose 6-phosphate; D-Sedoheptulose 7-phosphate; beta-D-Fructose 6-phosphate                                                                                                                                                                                                                                                                                                                                                                                                                                                                                                        |
| Caffeine metabolism                            | 1,7-Dimethylxanthine; 1-Methylxanthine                                                                                                                                                                                                                                                                                                                                                                                                                                                                                                                                                                                                                                                                                                                                                                       |
| Alkaloid biosynthesis II                       | Benzoate; Benzoic acid; Benzenecarboxylic acid; Phenylformic acid; N-Methylputrescine                                                                                                                                                                                                                                                                                                                                                                                                                                                                                                                                                                                                                                                                                                                        |
| Glycosphingolipid biosynthesis - ganglioseries | CMP; Cytidine-5'-monophosphate; Chondroitin; Galactose                                                                                                                                                                                                                                                                                                                                                                                                                                                                                                                                                                                                                                                                                                                                                       |
| Pyrimidine metabolism                          | Deoxyribose; 2-Deoxy-D-erythro-pentose; Thyminose; $\beta$ -TMP; Thymidine 5'-phosphate; Deoxythymidine 5'-phosphate; Thymidylic acid; 5'-Thymidylic acid; Thymidine monophosphate; Deoxythymidylic acid; dUMP; Deoxyuridylic acid; Deoxyuridine monophosphate; Deoxyuridine 5'-phosphate; 2'-Deoxyuridine 5'-phosphate; D-Glucose 1-phosphate; alpha-D-Glucose 1-phosphate; Cori ester; 5,6-Dihydrouracil; 2,4(1H,3H)-Pyrimidinedione, dihydro-; Dihydrouracile; Dihydrouracil; 5,6-Dihydro-2,4-dihydroxypyrimidine; Dihydrofolate; Dihydrofolic acid; 7,8-Dihydrofolate; 7,8-Dihydrofolic acid; CTP; Cytidine 5'-triphosphate; CMP; Cytidine-5'-monophosphate; 2-Deoxy-D-ribose 1-phosphate; dGTP; 2'-Deoxyguanosine 5'-triphosphate; Deoxyguanosine 5'-triphosphate; dUDP; 2'-Deoxyuridine 5'-diphosphate |

|                                                 |                                                                                                                                                                                                                                                                                                                                                                                                                                                                                                                                                                                                                                                                                                                                                                                                                                                                                                                                                                                                           |
|-------------------------------------------------|-----------------------------------------------------------------------------------------------------------------------------------------------------------------------------------------------------------------------------------------------------------------------------------------------------------------------------------------------------------------------------------------------------------------------------------------------------------------------------------------------------------------------------------------------------------------------------------------------------------------------------------------------------------------------------------------------------------------------------------------------------------------------------------------------------------------------------------------------------------------------------------------------------------------------------------------------------------------------------------------------------------|
| Tryptophan metabolism                           | L-Tryptophan; Tryptophan; Indole-3-acetaldehyde; 2-(Indol-3-yl)acetaldehyde; 3-Hydroxyanthranilate; Indolepyruvate; Indolepyruvic acid; (Indol-3-yl)pyruvate; Tetrahydrobiopterin; 4,8-Dihydroxyquinoline; 4,6-Dihydroxyquinoline; Quinoline-4,6-diol                                                                                                                                                                                                                                                                                                                                                                                                                                                                                                                                                                                                                                                                                                                                                     |
| Hexose phosphorylation                          | D-Mannose; Mannose; Seminose; cis-beta-D-Glucosyl-2-hydroxycinnamate; -Fructose 6-phosphate; D-Fructose 6-phosphoric acid; D-Glucose; Grape sugar; D-Glucose 6-phosphate; Glucose 6-phosphate; Robison ester; D-Fructose; Levulose; Fruit sugar; D-arabino-Hexulose                                                                                                                                                                                                                                                                                                                                                                                                                                                                                                                                                                                                                                                                                                                                       |
| Phosphatidylinositol phosphate metabolism       | Glycerol; Glycerin; 1,2,3-Trihydroxypropane; Dolichyl phosphate D-mannose; myo-Inositol; D-myo-Inositol; 1D-myo-Inositol; L-myo-Inositol; 1L-myo-Inositol; meso-Inositol; Inositol; Dambose; Cyclohexitol; Meat sugar; Inositol 1-phosphate; myo-Inositol 1-phosphate; 1D-myo-Inositol 1-phosphate; D-myo-Inositol 1-phosphate; CMP; Cytidine-5'-monophosphate; D-myo-Inositol 1,4,5-trisphosphate; 1D-myo-Inositol 1,4,5-trisphosphate; Inositol 1,4,5-trisphosphate; 1D-myo-Inositol 1,3,4-trisphosphate; D-myo-Inositol 1,3,4-trisphosphate; myo-Inositol 4-phosphate; D-myo-Inositol 4-phosphate; 1D-myo-Inositol 4-phosphate; 1D-myo-Inositol 4-monophosphate; D-Glucose 6-phosphate; Glucose 6-phosphate; 1D-myo-Inositol 3-phosphate; D-myo-Inositol 3-phosphate; myo-Inositol 3-phosphate; Inositol 3-phosphate; 1D-myo-Inositol 3-monophosphate; D-myo-Inositol 3-monophosphate; myo-Inositol 3-monophosphate; Inositol 3-monophosphate; 1L-myo-Inositol 1-phosphate; L-myo-Inositol 1-phosphate |
| Limonene and pinene degradation                 | Perillyl alcohol; (-)-Perillyl alcohol; p-Mentha-1,8-dien-7-ol; Perillyl aldehyde; Perillaldehyde                                                                                                                                                                                                                                                                                                                                                                                                                                                                                                                                                                                                                                                                                                                                                                                                                                                                                                         |
| Glycosphingolipid biosynthesis - globoseries    | CMP; Cytidine-5'-monophosphate; alpha-D-Galactose                                                                                                                                                                                                                                                                                                                                                                                                                                                                                                                                                                                                                                                                                                                                                                                                                                                                                                                                                         |
| Ascorbate (Vitamin C) and Aldarate Metabolism   | D-Glucarate; D-Glucaric acid; L-Gularic acid; d-Saccharic acid; Ascorbate; Ascorbic acid; L-Ascorbate; L-Ascorbic acid; D-glucurono-6,3-lactone                                                                                                                                                                                                                                                                                                                                                                                                                                                                                                                                                                                                                                                                                                                                                                                                                                                           |
| Lysine metabolism                               | L-Pipecolate; Pipecolinic acid; Pipecolic acid; 2-Piperidinecarboxylic acid; Dihydrolipoamide; L-2-Amino adipate; L-alpha-Amino adipate; L-alpha-Amino adipic acid; L-2-Amino adipic acid; L-2-Aminohexanedioate                                                                                                                                                                                                                                                                                                                                                                                                                                                                                                                                                                                                                                                                                                                                                                                          |
| Porphyrin metabolism                            | Ascorbate; Ascorbic acid; L-Ascorbate; L-Ascorbic acid; 5-Aminolevulinate; 5-Amino-4-oxopentanoate; 2-Amino-3-oxoadipate; 2-Amino-3-oxohexanedioic acid                                                                                                                                                                                                                                                                                                                                                                                                                                                                                                                                                                                                                                                                                                                                                                                                                                                   |
| Keratan sulfate degradation                     | N-Acetylneuraminate; N-Acetylneuraminic acid; 5-Acetamido-3,5-dideoxy-D-glycero-D-galacto-2-nonulosonic acid; D-Galactose                                                                                                                                                                                                                                                                                                                                                                                                                                                                                                                                                                                                                                                                                                                                                                                                                                                                                 |
| Starch and Sucrose Metabolism                   | D-Glucose 1-phosphate; alpha-D-Glucose 1-phosphate; Cori ester; D-Glucose; Grape sugar; Dextrose                                                                                                                                                                                                                                                                                                                                                                                                                                                                                                                                                                                                                                                                                                                                                                                                                                                                                                          |
| Vitamin B6 (pyridoxine) metabolism              | Pyridoxine phosphate; Pyridoxine 5-phosphate; Pyridoxine 5'-phosphate                                                                                                                                                                                                                                                                                                                                                                                                                                                                                                                                                                                                                                                                                                                                                                                                                                                                                                                                     |
| Aminosugars metabolism                          | D-Fructose 6-phosphate; D-Fructose 6-phosphoric acid; Cytidine 5'-triphosphate; N-Acetylneuraminate; N-Acetylneuraminic acid; 5-Acetamido-3,5-dideoxy-D-glycero-D-galacto-2-nonulosonic acid; CMP; Cytidine-5'-monophosphate; N-Glycolyl-neuraminate; N-Glycolylneuraminate; NeuNGc                                                                                                                                                                                                                                                                                                                                                                                                                                                                                                                                                                                                                                                                                                                       |
| Sialic acid metabolism                          | Glycerol; Glycerin; 1,2,3-Trihydroxypropane; myo-Inositol; D-myo-Inositol; 1D-myo-Inositol; L-myo-Inositol; 1L-myo-Inositol; meso-Inositol; Inositol; Dambose; Cyclohexitol; Meat sugar; N-Acetylneuraminate; N-Acetylneuraminic acid; 5-Acetamido-3,5-dideoxy-D-glycero-D-galacto-2-nonulosonic acid; CMP; Cytidine-5'-monophosphate; 1D-myo-Inositol 3-phosphate; D-myo-Inositol 3-phosphate; myo-Inositol 3-phosphate; Inositol 3-phosphate; 1D-myo-Inositol 3-monophosphate; D-myo-Inositol 3-monophosphate; myo-Inositol 3-monophosphate; Inositol 3-monophosphate; 1L-myo-Inositol 1-phosphate; myo-Inositol 4-phosphate; D-myo-Inositol 4-phosphate; 1D-myo-Inositol 4-phosphate; 1D-myo-Inositol 4-monophosphate; Inositol 1-phosphate; myo-Inositol 1-phosphate; 1D-myo-Inositol 1-phosphate; D-myo-Inositol 1-phosphate; 1D-myo-Inositol 1-monophosphate                                                                                                                                        |
| Carnitine shuttle                               | octadecenoyl carnitine                                                                                                                                                                                                                                                                                                                                                                                                                                                                                                                                                                                                                                                                                                                                                                                                                                                                                                                                                                                    |
| Vitamin B5 - CoA biosynthesis from pantothenate | CTP; Cytidine 5'-triphosphate; Pantetheine; (R)-Pantetheine                                                                                                                                                                                                                                                                                                                                                                                                                                                                                                                                                                                                                                                                                                                                                                                                                                                                                                                                               |
